# Supplementary material
Source: ML conference proceedings conference paper supplement (https://proceedings.neurips.cc/paper_files/paper/2019/hash/6244b2ba957c48bc64582cf2bcec3d04-Abstract.html)
Supplement: Supplementary file [file 6244b2ba957c48bc64582cf2bcec3d04-Supplemental.zip]

---

# Multivariate Triangular Quantile Maps for Novelty Detection

---

Jingjing Wang<sup>1</sup>, Sun Sun<sup>2</sup>, Yaoliang Yu<sup>1</sup>

University of Waterloo<sup>1</sup>, National Research Council Canada<sup>2</sup>  
{jingjing.wang, sun.sun, yaoliang.yu}@uwaterloo.ca

## Abstract

Novelty detection, a fundamental task in machine learning, has drawn a lot of recent attention due to its wide-ranging applications and the rise of neural approaches. In this work, we present a general framework for neural novelty detection that centers around a multivariate extension of the univariate quantile function. Our framework unifies and extends many classical and recent novelty detection algorithms, and opens the way to exploit recent advances in flow-based neural density estimation. We adapt the multiple gradient descent algorithm to obtain the first efficient end-to-end implementation of our framework that is free of tuning hyperparameters. Extensive experiments over a number of real datasets confirm the efficacy of our proposed method against state-of-the-art alternatives.

## 1 Introduction

Novelty detection refers to the fundamental task in machine learning that detects “novel” or “unusual” samples in a data stream. It has wide-ranging applications such as network intrusion detection [14], medical signal processing [17], jet design [19], video surveillance [42, 43], image scene analysis [25, 47], document classification [29, 30], reinforcement learning [39], etc.; see the review articles [7, 31, 32, 41] for more insightful applications. Over the last two decades or so, many novelty detection algorithms have been proposed and studied in the machine learning field, of which the statistical approach that aims to identify low-density regions of the underlying data distribution has been most popular [e.g. 4, 49, 51, 53]. More recently, new novelty detection algorithms based on deep neural networks [e.g. 1, 9, 11, 18, 26, 40, 44, 46, 48, 56, 58, 59] have drawn a lot of attention as they significantly improve their non-neural counterparts, especially in domains (such as image and video) where complex high-dimensional structures abound.

This work offers a closer look of these recent neural novelty detection algorithms, by making a connection to recent flow-based generative modelling techniques [22]. In §2 we show that the triangular map studied in [22] for neural density estimation serves as a natural extension of the classical univariate quantile function to the multivariate setting. Since density estimation is extremely challenging in high dimensions, recent neural novelty detection algorithms all extract a lower dimensional latent representation, whose probabilistic properties can then be captured by our multivariate triangular quantile map. Based on this observation we propose a general framework for neural novelty detection that includes as special cases many classical approaches such as one-class SVM [49] and support vector data description [53], as well as many recent neural approaches [e.g. 1, 40, 46, 58, 59]. This unified view of neural novelty detection enables us to better understand the similarities and subtle differences of the many existing approaches, and provides some guidance on designing next-generation novelty detection algorithms.

More importantly, our general framework makes it possible to effortlessly plug-in recent flow-based neural density estimators, which have been shown to be surprisingly effective even in moderately high dimensions. Furthermore, centering our framework around the (multivariate) triangular quantile map (TQM) also enables us to unify the two scoring strategies in the literature [34]: we can either threshold

the density function [4, 51] or the (univariate) quantile function [49, 53]. Using the multivariate triangular quantile map, *for the first time we can simultaneously perform both, without incurring any additional cost*. In §3, motivated by the sub-optimality of pre-training we cast our novelty detection framework as multi-objective optimization [35] and apply the multiple gradient descent algorithm [12, 15, 36] for the first time. We present an efficient implementation that learns the TQM consistently, end-to-end and free of tuning hyperparameters. In §4 we perform extensive experiments on a variety of datasets and verify the effectiveness of our framework against state-of-the-art alternatives.

We summarize our main contributions as follows:

- We extend the univariate quantile function to the multivariate setting through increasing triangular maps. This multivariate triangular quantile map may be of independent interest for many other problems involving multivariate probabilistic modelling.
- We present a new framework for neural novelty detection, which unifies and extends many existing approaches including the celebrated one-class SVM and many recent neural ones.
- For the first time we apply the multiple gradient descent algorithm to novelty detection and obtain an efficient end-to-end implementation of our framework that is free of any tuning hyperparameters.
- We perform extensive experiments to compare to existing novelty detection baselines and to confirm the efficacy of our proposed framework.

Our code is available at <https://github.com/GinGinWang/MTQ>.

## 2 A General Framework for Novelty Detection

In this section we present a general framework for novelty detection. Our framework builds on recent progresses in generative modelling and unifies and extends many existing works.

We follow the standard setup for novelty detection [e.g. 7]: Given  $n$  i.i.d. samples  $\{\mathbf{X}_1, \dots, \mathbf{X}_n\}$  from an unknown distribution  $P$  over  $\mathbb{R}^d$ , we want to decide if a new (unseen) sample  $\tilde{\mathbf{X}}$  is “novel,” i.e. if it is *unlikely* to come from the same distribution  $P$ . Due to lack of supervision, the notion of “novelty” is not well-defined. Practically, a popular surrogate is to identify the low-density regions of the distribution  $P$  [4, 49, 51], as samples from these areas are probabilistically unlikely. For simplicity we assume the underlying distribution  $P$  has a density  $p$  w.r.t. the Lebesgue measure.

We exploit the following multivariate generalization of the quantile function. Recall that the cumulative distribution function (CDF)  $F$  and the quantile function  $Q$  of a *univariate* random variable  $X$  is defined as:

$$F(x) = \Pr(X \leq x), \quad Q(u) = F^{-1}(u) := \inf\{x : F(x) \geq u\}.$$

While the CDF can be easily generalized to the multivariate setting, it is not so obvious for the quantile function, as its definition intrinsically relies on the total ordering on the real line. However, following [e.g. 13, 16] we observe that if  $U$  follows the uniform distribution over the interval  $[0, 1]$ , then  $Q(U)$  follows the distribution  $F$ . In other words, the quantile function can be defined as a mapping that pushes the uniform distribution over  $[0, 1]$  into the distribution  $F$  of interest. This alternative interpretation allows us to extend the quantile function to the multivariate setting. We recall that a mapping  $\mathbf{T} = (T_1, \dots, T_d) : \mathbb{R}^d \rightarrow \mathbb{R}^d$  is called triangular if for all  $j = 1, \dots, d$ , the  $j$ -th component  $T_j$  depends only on the first  $j$  coordinates of the input, and it is called increasing if for all  $j$ ,  $T_j$  is increasing w.r.t. the  $j$ -th coordinate when all other coordinates are fixed. We call  $\mathbf{T}$  triangular since its derivative is always a triangular matrix (and vice versa).

**Definition 1 (Triangular Quantile Map (TQM))** *Let  $\mathbf{X}$  be a random vector in  $\mathbb{R}^d$ , and let  $\mathbf{U}$  be uniform over the unit hypercube  $[0, 1]^d$ . We call an **increasing triangular map**  $\mathbf{Q} = \mathbf{Q}_{\mathbf{X}} : [0, 1]^d \rightarrow \mathbb{R}^d$  the triangular quantile map of  $\mathbf{X}$  if  $\mathbf{Q}(\mathbf{U}) \sim \mathbf{X}$ , where  $\sim$  means equality in distribution.*

Note that the TQM  $\mathbf{Q}$  is *vector-valued*, unlike the CDF which is always real-valued. The existence and *uniqueness* of  $\mathbf{Q}$  follows from results in [5]. Our definition immediately leads to the following quantile change-of-variable formula (cf. the usual change-of-variable formula for densities):

**Proposition 1** *Let  $\mathbf{T} : \mathbb{R}^d \rightarrow \mathbb{R}^d$  be an increasing triangular map. If  $\mathbf{Y} = \mathbf{T}(\mathbf{X})$ , then*

$$\mathbf{Q}_{\mathbf{Y}} = \mathbf{T} \circ \mathbf{Q}_{\mathbf{X}}. \tag{1}$$

Practically, eq. (1) allows us to easily stack elementary parameterizations of increasing triangular maps together and still obtain a valid TQM.

To our best knowledge, a similar definition, through conditional univariate quantiles, appeared in a number of works [2, 10, 37, 45], albeit mostly as a theoretical tool. Our definition makes the important triangular structure explicit and amenable to parameterization through deep networks. Needless to say, when  $d = 1$ , the triangular property is vacuous and our definition reduces to the classical quantile function. For a more comprehensive introduction to triangular maps and its recent rise in machine learning, see [22, 33, 50].

**Remark 1** *A different definition of the multivariate quantile map, based on the theory of optimal transport [54], is discussed in a number of recent works [e.g. 8, 13, 16]:  $\mathbf{Q}$  is instead constrained to be maximally cyclically monotone, i.e. it is the subdifferential of some convex function. On one hand, this definition is invariant to permutations of the input coordinates while ours is not. On the other hand, our definition is composition friendly (see Proposition 1) hence can easily exploit recent progresses in deep generative models, as we will see shortly. The two definitions coincide with each other only when reduced to the univariate case.*

*We note that the recent work of Inouye and Ravikumar [21] proposed yet another similar definition where  $\mathbf{Q}$  (termed density destructor there) is only required to be invertible. However, this definition does not lead to a unique quantile map and it is less computationally convenient.*

We are now ready to present our general framework for novelty detection. Let  $\mathbf{f} : \mathbb{R}^d \rightarrow \mathbb{R}^m$  be a feature map and  $\mathbf{X}$  a random sample from the unknown density  $p$ . We propose to learn the density<sup>1</sup>  $\mathbf{f}_{\#}p$  of the latent random vector  $\mathbf{Z} = \mathbf{f}(\mathbf{X})$  using the approach illustrated in [22]. In details, we learn the feature map  $\mathbf{f}$  and the TQM  $\mathbf{Q}$  *simultaneously* by minimizing the following objective:

$$\min_{\mathbf{f}, \mathbf{Q}} \gamma \text{KL}(\mathbf{f}_{\#}p \| \mathbf{Q}_{\#}q) + \lambda \ell(\mathbf{f}) + \zeta g(\mathbf{Q}), \quad (2)$$

where  $g$  embodies some potential constraints on the increasing triangular map  $\mathbf{Q}$ ,  $\ell$  is some loss associated with learning the feature map  $\mathbf{f}$ ,  $q$  is a fixed reference density (in our case the uniform density over the hypercube  $[0, 1]^m$ ),  $\zeta, \lambda, \gamma \geq 0$  are regularization constants, and we use the KL-divergence to measure the discrepancy between two densities. Exploiting Proposition 1 we parameterize the TQM as the composition  $\mathbf{Q} = \mathbf{T} \circ \Phi^{-1}$ , where  $\Phi = (\Phi_1, \dots, \Phi_m)$  with  $\Phi_i$  the CDF of standard univariate Gaussian and  $\mathbf{T} : \mathbb{R}^d \rightarrow \mathbb{R}^d$  an increasing triangular map. Note that unlike  $\mathbf{Q}$  whose support is constrained to the unit hypercube, there is no constraint on the support of  $\mathbf{T}$ , hence it is easier to handle the latter computationally.

Once the feature map  $\mathbf{f}$  and TQM  $\mathbf{Q}$  are estimated (see next section), we can detect novel test samples by either thresholding the density function of the latent variable  $\mathbf{Z}$  or thresholding its TQM. In details, the density of  $\mathbf{Z} = \mathbf{f}(\mathbf{X}) = \mathbf{Q}(\mathbf{U}) = \mathbf{T}(\Phi^{-1}(\mathbf{U}))$ , using the change-of-variable formula, is

$$p_{\mathbf{Z}}(\mathbf{z}) = 1/|\mathbf{Q}'(\mathbf{Q}^{-1}(\mathbf{z}))| = \frac{1}{|\mathbf{T}'(\mathbf{T}^{-1}(\mathbf{z}))|} \cdot \prod_{j=1}^m \varphi([\mathbf{T}^{-1}(\mathbf{z})]_j), \quad \text{where } \varphi = \Phi'.$$

Thus, we declare a test sample  $\tilde{\mathbf{X}}$  to be “novel” if

$$\log |\mathbf{T}'(\mathbf{T}^{-1}(\mathbf{f}(\tilde{\mathbf{X}})))| + \frac{1}{2} \|\mathbf{T}^{-1}(\mathbf{f}(\tilde{\mathbf{X}}))\|_2^2 \geq \tau, \quad (3)$$

where  $\tau$  is some chosen threshold. Crucially, since  $\mathbf{T}$  is increasing triangular,  $\mathbf{T}^{-1}$  and the triangular determinant  $|\mathbf{T}'|$  can both be computed very efficiently [22]. The (slight) downside of this density approach is that the scale of an appropriate threshold  $\tau$  is usually difficult to guess.

Alternatively, we can declare a test sample  $\tilde{\mathbf{X}}$  to be “novel” by directly thresholding the TQM  $\mathbf{Q}$ . Indeed, let  $N \subseteq [0, 1]^m$  be a subset whose (uniform) measure is  $1 - \alpha$  for some  $\alpha \in (0, 1)$ , then we say  $\tilde{\mathbf{X}}$  is “novel” iff

$$\mathbf{Q}^{-1}(\mathbf{f}(\tilde{\mathbf{X}})) \notin N. \quad (4)$$

For instance, we can choose  $N$  to be the cube centered at  $(1/2, \dots, 1/2)$  and with side length  $(1 - \alpha)^{1/m}$ , in which case

$$\mathbf{Q}^{-1}(\mathbf{f}(\tilde{\mathbf{X}})) \notin N \iff \|\mathbf{Q}^{-1}(\mathbf{f}(\tilde{\mathbf{X}})) - \frac{1}{2}\|_{\infty} \geq (1 - \alpha)^{1/m}/2.$$

<sup>1</sup>The notation  $\mathbf{T}_{\#}p$  stands for the push-forward density, i.e., the density of  $\mathbf{T}(\mathbf{X})$  when  $\mathbf{X} \sim p$ .

The upside of this quantile approach is that we can control Type-I error (i.e. false positive) precisely, i.e. if  $\tilde{\mathbf{X}}$  is indeed sampled from  $p$ , then we will declare it to be novel with probability at most  $\alpha$ .

Before proceeding to the implementation details of (2), let us mention the advantages of our general framework (2) for novelty detection: (a) It allows us to perform feature extraction on the original sample  $\mathbf{X}$  in an end-to-end fashion. As is well-known, density estimation hence also novelty detection becomes extremely challenging when the dimension  $d$  is high. Our framework alleviates this curse-of-dimensionality by setting  $m \ll d$  and employing  $\mathbf{f}$  to perform dimensionality reduction. (b) Our end-to-end framework enables us to adopt the recent flow-based density estimation algorithms, which have been shown to be universally consistent [20, 22] and extremely effective in practice. (c) By estimating the TQM  $\mathbf{Q}$  once, we can employ the two scoring rules, i.e. the density scoring rule (3) and the quantile scoring rule (4), simultaneously, without incurring any extra overhead. This allows us to perform a fair and comprehensive experimental comparison of the two complementary approaches. (d) Last but not least, our framework recovers, unifies, and extends many existing approaches in the literature. Let us conclude this section with some examples.

**Example 1 (One-class SVM [49])** *As shown in [52], the one-class SVM minimizes precisely the conditional value-at-risk, which is the average of the tail of a distribution:*

$$\min_f \text{CVaR}_\alpha(f(\mathbf{X})) + \lambda \|f\|_{\mathcal{H}_\kappa}^2, \quad \text{where} \quad \text{CVaR}_\alpha(Z) := \mathbb{E}(Z|Z \geq Q_Z(\alpha)),$$

$Q_Z(\alpha)$  is the  $\alpha$ -th quantile of the real random variable  $Z$ , and  $\mathcal{H}_\kappa$  is the reproducing kernel Hilbert space (RKHS) induced by some kernel  $\kappa$ . This approach employs the quantile scoring rule (4).

To cast one-class SVM into our framework (2), let us set  $m = 1$  hence the TQM reduces to the classical one. Let  $\ell(f) = \|f\|_{\mathcal{H}_\kappa}^2$  and  $g(\mathbf{Q}) = \text{CVaR}_\alpha(\mathbf{Q}_{\#}q)$ . Now with  $\zeta = 1$  and  $\gamma = \infty$  in (2) we recover the celebrated one-class SVM.

If instead of choosing  $f$  from an RKHS, we represent  $f$  using a deep network, then we recover the recent approach in [6].

**Example 2 (Support Vector Data Description (SVDD) [53])** *Similar to one-class SVM, it is easy to show that SVDD also minimizes the conditional value-at-risk:*

$$\min_{\mathbf{c} \in \mathcal{H}_\kappa} \text{CVaR}_\alpha(\|\varphi(\mathbf{X}) - \mathbf{c}\|_{\mathcal{H}_\kappa}^2),$$

where  $\varphi : \mathbb{R}^d \rightarrow \mathcal{H}_\kappa$  is the canonical feature map of the RKHS. This approach also employs the quantile scoring rule (4). It is well-known known that SVDD and one-class SVM are equivalent for radial kernels [e.g. 49].

Again in this case  $m = 1$ . Let  $f(\mathbf{X}) = \|\varphi(\mathbf{X}) - \mathbf{c}\|_{\mathcal{H}_\kappa}^2$ ,  $\ell \equiv 0$  and  $g(\mathbf{Q}) = \text{CVaR}_\alpha(\mathbf{Q}_{\#}q)$ . As  $\gamma$  approaches  $\infty$  in (2), we recover the SVDD formulation.

If instead of choosing  $\varphi$  as the canonical feature map of an RKHS, we represent  $\varphi$  using a deep network, then we recover the recent approach in [44].

**Example 3 (Latent Space Autoregression (LSA) [1])** *The recent work [1], following a sequence of previous attempts [40, 46, 58, 59], proposed to learn the feature map  $\mathbf{f}$  using an auto-encoder structure, and to learn the density of the latent variable  $\mathbf{Z} = \mathbf{f}(\mathbf{X})$  using an autoregressive model, which, as argued in [22], exactly corresponds to a triangular map. In other words, if we set  $\mathbf{f}$  as the parameters of an auto-encoder,  $\ell$  to be its reconstruction loss, and  $g \equiv 0$ , then our framework (2) reduces to LSA. However, our general framework opens the way to exploit more advanced flow-based density estimation algorithms, as well as the quantile scoring rule (4).*

### 3 Estimating TQM Using Deep Networks

In this section we show how to estimate the TQM  $\mathbf{Q}$  in (2) based on samples  $\{\mathbf{X}_1, \dots, \mathbf{X}_n\} \stackrel{i.i.d.}{\sim} p$ . In particular, any flow-based neural density estimator can be plugged into our framework.

Our framework (2) has three components which we implement as follows:

- A feature extractor  $\mathbf{f}$  for performing dimensionality reduction. Following previous works [1, 40, 46, 58, 59] we implement  $\mathbf{f}$  through a deep autoencoder that consists of one encoder  $\mathbf{Z} = \mathcal{E}(\mathbf{X}; \theta_E)$

and one decoder  $\hat{\mathbf{X}} = \mathcal{D}(\mathbf{Z}; \boldsymbol{\theta}_D)$ . We use the Euclidean reconstruction loss:

$$\ell(\mathbf{f}) = \ell(\boldsymbol{\theta}_E, \boldsymbol{\theta}_D) = \sum_{i=1}^n \|\mathbf{X}_i - \hat{\mathbf{X}}_i\|^2.$$

As argued in [3], the reconstruction error, aside from low likelihood, is an important indicator for ‘‘novelty.’’ Indeed, since the autoencoder is trained on nominal data, a test sample will incur a large reconstruction error only when it is novel, as such samples have never been encountered before.

- A flow-based neural density estimator for  $\mathbf{Q}$ . Here we adopt the sum-of-squares (SOS) flow proposed in [22], although other neural density estimators would apply equally well. The SOS flow consists of two parts: an increasing (univariate) polynomial  $\mathfrak{P}_{2r+1}(u; \mathbf{a})$  with degree  $2r + 1$  for modelling conditional densities and a conditioner network  $C_j(u_1, \dots, u_{j-1}; \boldsymbol{\theta}_Q)$  for generating the coefficients  $\mathbf{a}$  of the polynomial:

$$\mathfrak{P}_{2r+1}(u; \mathbf{a}) = c + \int_0^u \sum_{s=1}^k (\sum_{l=0}^r a_{l,s} t^l)^2 dt,$$

where  $c \in \mathbb{R}$  is an arbitrary constant,  $r \in \mathbb{N}$  is the degree of polynomial, and  $k$  can be chosen as small as 2. In other words, the TQM  $\mathbf{Q}$  learned using SOS flow has the following form:

$$\mathbf{Q} = \mathbf{T} \circ \Phi^{-1}, \quad \text{where } \forall j, T_j(u_1, \dots, u_j) = \mathfrak{P}_{2r+1}(u_j; C_j(u_1, \dots, u_{j-1}; \boldsymbol{\theta}_Q)). \quad (5)$$

Any regularization term on the conditioner network weights  $\boldsymbol{\theta}_Q$  can be put into the function  $g(\mathbf{Q})$  in our framework (2).

- Lastly, the KL-divergence term in (2) can be approximated empirically using the given sample  $\{\mathbf{X}_1, \dots, \mathbf{X}_n\}$ . Upon dropping irrelevant constants we reduce the KL term in (2) to:

$$\min_{\boldsymbol{\theta}_Q} \sum_{i=1}^n \left[ \log |\mathbf{Q}'(\mathbf{Q}^{-1}(\mathbf{f}(\mathbf{X}_i)))| - \log q(\mathbf{Q}^{-1}(\mathbf{f}(\mathbf{X}_i))) \right],$$

where each component of  $\mathbf{Q}$  is given in (5). Crucially, since  $\mathbf{Q}$  is increasing triangular, evaluating the inverse  $\mathbf{Q}^{-1}$  and the Jacobian  $|\mathbf{Q}'|$  can both be done in linear time [22].

Since  $q$  is the uniform density over the hypercube, upon simplification the final training objective we use in our experiments is as follows. Let  $\mathbf{Z}_i = \mathcal{E}(\mathbf{X}_i; \boldsymbol{\theta}_E)$ , we aim to solve:

$$\min_{\boldsymbol{\theta}} \sum_{i=1}^n (1 - \lambda) \left[ \underbrace{\log |\mathbf{T}'(\mathbf{T}^{-1}(\mathbf{Z}_i))| + \|\mathbf{T}^{-1}(\mathbf{Z}_i)\|_2^2 / 2}_{\text{negative log-likelihood } h(\mathbf{X}_i; \boldsymbol{\theta})} \right] + \lambda \underbrace{\|\mathbf{X}_i - \mathcal{D}(\mathbf{Z}_i; \boldsymbol{\theta}_D)\|^2}_{\text{reconstruction loss } \ell(\mathbf{X}_i; \boldsymbol{\theta})}, \quad (6)$$

and recall that  $\mathbf{Q} = \mathbf{T} \circ \Phi^{-1}$  is parameterized through the conditioner network weights  $\boldsymbol{\theta}_Q$  in (5). We did not find it necessary to further regularize  $\mathbf{Q}$  hence set  $g \equiv 0$  in (2) and w.l.o.g.  $\gamma = 1 - \lambda$ .

The first KL term in (2), as is well-known, reduces to the negative log-likelihood of the latent random vectors  $\mathbf{Z}_i$  in (6), and the second term is the standard reconstruction loss. The two terms share the encoder weights  $\boldsymbol{\theta}_E$  and the trade-off is balanced through the hyperparameter  $\lambda$ . This design choice conforms to the psychology findings in [3]. In practice, we found that the variance of the log-likelihood is much larger than that of the reconstruction loss, and as a consequence we observed substantial difficulty in directly minimizing the weighted objective in (6). A popular pre-training heuristic is to train the whole model in two stages: we first minimize the reconstruction loss  $\ell(\boldsymbol{\theta}_E, \boldsymbol{\theta}_D)$  and then, with the learned hidden vector  $\mathbf{Z}$ , we estimate the TQM  $\mathbf{Q}$  by maximum likelihood. However, as shown in [59], the latent representation learned in the first stage does not necessarily help the task in the second stage.

Instead, we cast the two competing objectives in (6) as multi-objective optimization, which we solve using the multiple gradient descent algorithm (MGDA) [12, 15, 36]. Our motivation comes from the following observation: the two-stage procedure amounts to first setting  $\lambda = 1$  and running gradient descent (GD) for a number of iterations, then switching to  $\lambda = 0$  (or  $\lambda = 0.5$  say) and running GD for the remaining iterations. Naturally, instead of any pre-determined schedule for the hyperparameter  $\lambda$  (such as switching from 1 to 0 or 0.5), why not let GD decide what  $\lambda$  to use in each iteration? This is precisely the main idea behind MGDA, where at iteration  $t$  we solve

$$\lambda_t = \operatorname{argmin}_{0 \leq \lambda \leq 1} \left\| \sum_{i \in I} (1 - \lambda) \nabla h(\mathbf{X}_i; \boldsymbol{\theta}_t) + \lambda \nabla \ell(\mathbf{X}_i; \boldsymbol{\theta}_t) \right\|^2 = \min \left\{ 1, \max \left\{ 0, \frac{\langle \nabla h_I - \nabla \ell_I, \nabla h_I \rangle}{\|\nabla h_I - \nabla \ell_I\|^2} \right\} \right\},$$

where  $I \subseteq \{1, \dots, n\}$  is a minibatch of samples, and obviously  $\nabla h_I = \sum_{i \in I} \nabla h(\mathbf{X}_i; \boldsymbol{\theta}_t)$  and similarly for  $\nabla \ell_I$ . With  $\lambda_t$  calculated we can continue the gradient update:

$$\boldsymbol{\theta}_{t+1} = \boldsymbol{\theta}_t - \eta[(1 - \lambda_t)\nabla h_I + \lambda_t\nabla \ell_I],$$

where  $\eta \geq 0$  is the step size. As shown in [12], this algorithm converges to a Pareto-optimal solution under fairly general conditions. Pleasantly, MGDA eliminates the need of tuning the hyperparameter  $\lambda$  as it is determined automatically on the fly. To our best knowledge, our work is the first to demonstrate the effectiveness of MGDA on novelty detection tasks.

We end our discussion by pointing out that the algorithm we develop here can easily be adapted to other design choices that fit into our general framework (2). For instance, if we use a variational autoencoder [23] or a denoising autoencoder [55], then we need only replace the square reconstruction loss in (6) accordingly.

## 4 Empirical Results

In this section, we evaluate the performance of our proposed method for novelty detection and compare it with the traditional and state-of-the-art alternatives. For evaluation, we use precision, recall, F1 score, and the Area Under Receiver Operating Characteristic (AUROC) curve as our performance metrics, which are commonly used in previous works.

### 4.1 Datasets

In our experiments, we use two public image datasets: MNIST and Fashion-MNIST, as well as two non-image datasets: KDDCUP and Thyroid. A detailed description of these datasets, the applied network architectures, and the training hyperparameters can be found in Appendix A. For MNIST and Fashion-MNIST, each of the ten classes is deemed as the nominal class while the rest of the nine classes are deemed as the novel class. We use the standard training and test splits. For every class, we hold out 10% of the training set as the validation set, which is used to tune hyperparameters and to monitor the training process.

### 4.2 Competitor Algorithms

We compare our method with the following alternative algorithms:

- **OC-SVM** [49]. OC-SVM is a traditional kernel-based quantile approach which has been widely used in practice for novelty detection. We use the RBF kernel in our experiments. We consider two OC-SVM-based methods for comparison. 1) RAW-OC-SVM: the input is directly fed to OC-SVM; 2) CAE-OC-SVM: a convolutional autoencoder is first applied to the input data for dimensionality reduction, and then the low-dimensional latent representation is fed to OC-SVM.
- **Geometric transformation (GT)** [18]. A self-labeled multi-class dataset is first created by applying a set of geometric transformations to the original nominal examples. Then, a multi-class classifier is trained to discriminate the geometric transformations of each nominal example. The scoring function in GT is the conditional probability of the softmax responses of the classifier given the geometric transformations.
- **Variational autoencoder (VAE)** [23]. The evidence lower bound is used as the scoring function.
- **Denoising autoencoder (DAE)** [55]. The reconstruction error is used as the scoring function.
- **Deep structured energy-based models (DSEBM)** [58]. DSEBM employs a deterministic deep neural network to output the energy function (i.e., negative log-likelihood), which is used to form the density of nominal data. The network is trained by score matching in a way similar to training DAE. Two scoring functions based on reconstruction error and energy score are considered.
- **Deep autoencoding Gaussian mixture model (DAGMM)** [59]. DAGMM consists of a compression network implemented using a deep autoencoder and a Gaussian mixture estimation network that outputs the joint density of the latent representations and some reconstruction features from the autoencoder. The energy function is used as the scoring function.
- **Generative probabilistic novelty detection (GPND)** [40]. GPND, based on adversarial autoencoders, employs an extra adversarial loss to impose priors on the output distribution. The density is

Table 1: AUROC of Variants of Our Method on MNIST

| Scoring function | $\lambda = 0.99$ | 0.9    | 0.5    | 0.1    | Optimized     |
|------------------|------------------|--------|--------|--------|---------------|
| NLL              | <b>0.9729</b>    | 0.9692 | 0.9537 | 0.9389 | 0.9728        |
| TQM <sub>1</sub> | 0.9622           | 0.9616 | 0.9430 | 0.9319 | <b>0.9666</b> |
| TQM <sub>2</sub> | 0.9666           | 0.9645 | 0.9465 | 0.9347 | <b>0.9699</b> |
| TQM <sub>∞</sub> | 0.9499           | 0.9527 | 0.9371 | 0.9128 | <b>0.9531</b> |

Table 2: Average Precision, Recall, and F1 Score on Non-image Datasets

| Method                | Thyroid       |               |               | KDDCUP        |               |               |
|-----------------------|---------------|---------------|---------------|---------------|---------------|---------------|
|                       | Precision     | Recall        | F1            | Precision     | Recall        | F1            |
| RAW-OC-SVM *          | 0.3639        | 0.4239        | 0.3887        | 0.7457        | 0.8523        | 0.7954        |
| DSEBM *               | 0.0404        | 0.0403        | 0.0403        | 0.7369        | 0.7477        | 0.7423        |
| DAGMM *               | 0.4766        | 0.4834        | 0.4782        | 0.9297        | 0.9442        | 0.9369        |
| Ours-REC              | –             | –             | –             | 0.6305        | 0.6287        | 0.6296        |
| Ours-NLL              | 0.7312        | 0.7312        | 0.7312        | <b>0.9622</b> | <b>0.9622</b> | <b>0.9622</b> |
| Ours-TQM <sub>1</sub> | 0.5269        | 0.5269        | 0.5269        | 0.9621        | 0.9621        | 0.9621        |
| Ours-TQM <sub>2</sub> | 0.5806        | 0.5806        | 0.5806        | <b>0.9622</b> | <b>0.9622</b> | <b>0.9622</b> |
| Ours-TQM <sub>∞</sub> | <b>0.7527</b> | <b>0.7527</b> | <b>0.7527</b> | <b>0.9622</b> | <b>0.9622</b> | <b>0.9622</b> |

used as the scoring function. By linearizing the manifold that nominal data resides on, its density is factorized into two product terms, which are then approximately computed using nominal data.

- **Latent space autoregression (LSA)** [1]. A parametric autoregressive model is used to estimate the density of the latent representation generated by a deep autoencoder, where the conditional probability densities are modeled as multinomials over quantized latent representations. The sum of the normalized reconstruction error and log-likelihood is used as the scoring function.

### 4.3 Variants of Our Method

In this subsection, we first compare some variants of our proposed method. With regard to the network configuration, except on Thyroid whose dimension is too small to require any form of dimensionality reduction, all other experiments contain both an autoencoder and an estimation network.

We consider the following five scoring functions that we threshold at some level  $\tau$ . In particular, given a test example  $\tilde{\mathbf{X}}$ , we denote its reconstruction by  $\hat{\mathbf{X}}$  and its latent representation by  $\tilde{\mathbf{Z}} = \mathbf{f}(\tilde{\mathbf{X}})$ .

- Reconstruction error (REC):  $\|\tilde{\mathbf{X}} - \hat{\mathbf{X}}\|^2$ ;
- Negative log-likelihood (NLL):  $\log |\mathbf{T}'(\mathbf{T}^{-1}(\tilde{\mathbf{Z}}))| + \|\mathbf{T}^{-1}(\tilde{\mathbf{Z}})\|_2^2/2$ ;
- 1-norm of quantile (TQM<sub>1</sub>):  $\|\Phi(\mathbf{T}^{-1}(\tilde{\mathbf{Z}})) - \frac{1}{2}\|_1$ ,
- 2-norm of quantile (TQM<sub>2</sub>):  $\|\Phi(\mathbf{T}^{-1}(\tilde{\mathbf{Z}})) - \frac{1}{2}\|_2$ ;
- Infinity norm of quantile (TQM<sub>∞</sub>):  $\|\Phi(\mathbf{T}^{-1}(\tilde{\mathbf{Z}})) - \frac{1}{2}\|_\infty$ .

In Table 1, we compare two approaches on MNIST for selecting the hyperparameter  $\lambda$  in the training phase: 1) chosen from a pre-set family using the validation set; and 2) automatically optimized using MGDA [12, 15, 36]. We report the average AUROC over 10 classes. It is clear that for all scoring functions, the optimized  $\lambda$  generally leads to the highest AUROC. This is also observed on other datasets such as Fashion-MNIST. Within the proposed variants, NLL results in the highest AUROC among all scoring functions, followed by TQM<sub>2</sub>. In Table 2, on the two non-image datasets we evaluate the average precision, recall, and F1 score. The superscript \* on the baselines indicates that the results are directly quoted from the respective references. The threshold is chosen by assuming the prior knowledge of the ratio between the novel and nominal examples in the test set. Under this assumption, the number of false positives is equal to that of false negatives, thus the value of the three metrics coincides. On Thyroid, TQM<sub>∞</sub> is slightly better than the density-based method. On KDDCUP, the density and quantile-based approaches have the same performance, while REC results in the worst performance. On both datasets, our proposed methods are superior to the benchmarks.

Table 3: AUROC on MNIST and Fashion-MNIST

| MNIST |        |       |       |       |       |       |       |              |       |          |                       |
|-------|--------|-------|-------|-------|-------|-------|-------|--------------|-------|----------|-----------------------|
| Class | OC-SVM |       | VAE   | DAE   | LSA   | GT    | DAGMM | GPND         | DSEBM | Ours-NLL | Ours-TQM <sub>2</sub> |
|       | RAW    | CAE   |       |       |       |       |       |              |       |          |                       |
| 0     | 0.995  | 0.990 | 0.985 | 0.982 | 0.998 | 0.982 | 0.500 | 0.999        | 0.320 | 0.995    | 0.993                 |
| 1     | 0.999  | 0.999 | 0.997 | 0.998 | 0.999 | 0.999 | 0.893 | 0.766        | 0.999 | 0.987    | 0.998                 |
| 2     | 0.926  | 0.919 | 0.943 | 0.936 | 0.923 | 0.993 | 0.326 | 0.980        | 0.482 | 0.953    | 0.948                 |
| 3     | 0.936  | 0.939 | 0.916 | 0.929 | 0.974 | 0.987 | 0.319 | 0.968        | 0.753 | 0.963    | 0.957                 |
| 4     | 0.967  | 0.946 | 0.945 | 0.940 | 0.955 | 0.993 | 0.368 | 0.980        | 0.696 | 0.966    | 0.963                 |
| 5     | 0.955  | 0.936 | 0.929 | 0.928 | 0.966 | 0.994 | 0.490 | 0.987        | 0.727 | 0.962    | 0.960                 |
| 6     | 0.987  | 0.979 | 0.977 | 0.982 | 0.992 | 0.999 | 0.515 | 0.998        | 0.954 | 0.992    | 0.990                 |
| 7     | 0.966  | 0.951 | 0.975 | 0.971 | 0.969 | 0.966 | 0.500 | 0.988        | 0.911 | 0.969    | 0.966                 |
| 8     | 0.903  | 0.896 | 0.864 | 0.857 | 0.935 | 0.974 | 0.467 | 0.929        | 0.536 | 0.955    | 0.951                 |
| 9     | 0.962  | 0.960 | 0.967 | 0.974 | 0.969 | 0.993 | 0.813 | 0.993        | 0.905 | 0.977    | 0.976                 |
| avg   | 0.960  | 0.952 | 0.950 | 0.950 | 0.968 | 0.977 | 0.508 | <b>0.982</b> | 0.727 | 0.973    | 0.970                 |

  

| Fashion-MNIST |        |       |       |       |       |              |       |       |       |          |                       |
|---------------|--------|-------|-------|-------|-------|--------------|-------|-------|-------|----------|-----------------------|
| Class         | OC-SVM |       | VAE   | DAE   | LSA   | GT           | DAGMM | GPND  | DSEBM | Ours-NLL | Ours-TQM <sub>2</sub> |
|               | RAW    | CAE   |       |       |       |              |       |       |       |          |                       |
| 0             | 0.919  | 0.908 | 0.874 | 0.867 | 0.916 | 0.903        | 0.303 | 0.917 | 0.891 | 0.922    | 0.917                 |
| 1             | 0.990  | 0.987 | 0.977 | 0.978 | 0.983 | 0.993        | 0.311 | 0.983 | 0.560 | 0.958    | 0.950                 |
| 2             | 0.894  | 0.884 | 0.816 | 0.808 | 0.878 | 0.927        | 0.475 | 0.878 | 0.861 | 0.899    | 0.899                 |
| 3             | 0.942  | 0.911 | 0.912 | 0.914 | 0.923 | 0.906        | 0.481 | 0.945 | 0.903 | 0.930    | 0.925                 |
| 4             | 0.907  | 0.913 | 0.872 | 0.865 | 0.897 | 0.907        | 0.499 | 0.906 | 0.884 | 0.922    | 0.921                 |
| 5             | 0.918  | 0.865 | 0.916 | 0.921 | 0.907 | 0.954        | 0.413 | 0.924 | 0.859 | 0.894    | 0.884                 |
| 6             | 0.834  | 0.820 | 0.738 | 0.738 | 0.841 | 0.832        | 0.420 | 0.785 | 0.782 | 0.844    | 0.838                 |
| 7             | 0.988  | 0.984 | 0.976 | 0.977 | 0.977 | 0.981        | 0.374 | 0.984 | 0.981 | 0.980    | 0.972                 |
| 8             | 0.903  | 0.877 | 0.795 | 0.782 | 0.910 | 0.976        | 0.518 | 0.916 | 0.865 | 0.945    | 0.943                 |
| 9             | 0.982  | 0.955 | 0.965 | 0.963 | 0.984 | 0.994        | 0.378 | 0.876 | 0.967 | 0.983    | 0.983                 |
| avg           | 0.928  | 0.910 | 0.884 | 0.881 | 0.922 | <b>0.937</b> | 0.472 | 0.911 | 0.855 | 0.928    | 0.923                 |

#### 4.4 Comparison with Baseline Methods

In this section, we compare our method with the baseline approaches. Note that except RAW-OC-SVM and GT, all other methods, including our own, are based on autoencoders.

In Table 3, we show the comparison of AUROC on the image datasets. Among the proposed quantile scoring functions we only list TQM<sub>2</sub>, which outputs the highest value of AUROC. We observe that on both datasets our proposed methods are superior to most of the benchmarks, with the density scoring function being slightly better than the quantile one. On MNIST, GPND and GT have better performance; and on Fashion-MNIST, GT outputs the highest value of AUROC followed by Ours-NLL and RAW-OC-SVM. However, since GT explicitly extracts features by using a set of geometric transformations, it inevitably suffers a high computational and space complexity. In Appendix B, we further compare and discuss the proposed density and quantile-based approaches in detail.

#### 4.5 Comparison with Two-Stage Training

In our proposed algorithm the autoencoder and the estimation network are trained jointly by employing MGDA. For comparison, we also consider the following two-stage training strategies:

- We first train the autoencoder, then fix the autoencoder and train the estimation network alone (denoted as Fix-).
- we first pretrain the autoencoder, then jointly train the autoencoder and the estimation network with the weight  $\lambda$  fixed to 0.5 (denoted as Pretrain-).

The comparison regarding AUROC on MNIST is shown in Table 4. We found that the proposed joint training method leads to the best performance for both the density-based and the quantile-based scoring functions. This is consistent with the findings in many existing works [e.g. 1, 6, 44, 58]. For the fixed two-stage method, our understanding is that the latent representation learned in the first stage may not be the most beneficial for the training of the estimation network in the second stage, which in turn degrades the overall performance. For the pretrained two-stage method, although in the second stage the two parts are trained jointly the autoencoder is initialized with the parameters



Table 4: Comparison between joint and two-stage training: AUROC on MNIST

| Class | Fix-NLL       | Pretrain-NLL  | Ours-NLL      | Fix-TQM <sub>2</sub> | Pretrain-TQM <sub>2</sub> | Ours-TQM <sub>2</sub> |
|-------|---------------|---------------|---------------|----------------------|---------------------------|-----------------------|
| 0     | 0.9939        | <b>0.9954</b> | 0.9951        | 0.9904               | <b>0.9939</b>             | 0.9925                |
| 1     | 0.9971        | <b>0.9988</b> | 0.9977        | 0.9972               | <b>0.9985</b>             | 0.9969                |
| 2     | 0.9403        | <b>0.9677</b> | 0.9526        | 0.9188               | <b>0.9568</b>             | 0.9479                |
| 3     | 0.9568        | 0.9496        | <b>0.9627</b> | <b>0.9481</b>        | 0.9414                    | 0.9567                |
| 4     | <b>0.9703</b> | 0.9445        | 0.9657        | <b>0.9700</b>        | 0.9388                    | 0.9625                |
| 5     | 0.9612        | 0.9564        | <b>0.9618</b> | 0.9525               | 0.9486                    | <b>0.9601</b>         |
| 6     | 0.9878        | 0.9907        | <b>0.9915</b> | 0.9841               | 0.9881                    | <b>0.9895</b>         |
| 7     | 0.9629        | 0.9676        | <b>0.9686</b> | 0.9587               | 0.9656                    | <b>0.9660</b>         |
| 8     | 0.9549        | <b>0.9587</b> | 0.9551        | 0.9397               | <b>0.9527</b>             | 0.9512                |
| 9     | 0.9736        | 0.9733        | <b>0.9768</b> | 0.9742               | 0.9641                    | <b>0.9756</b>         |
| avg   | 0.9699        | 0.9703        | <b>0.9728</b> | 0.9634               | 0.9649                    | <b>0.9699</b>         |

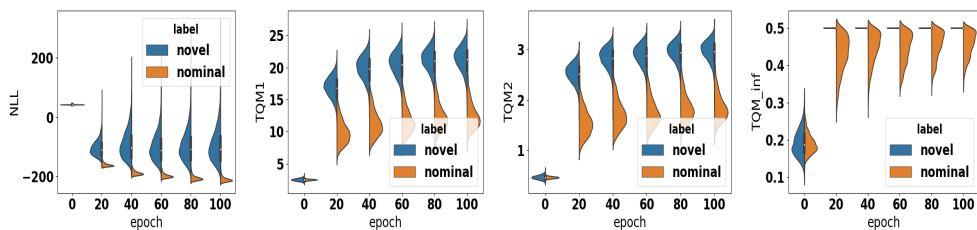Figure 1: Distributional comparison on training and test scoring statistics on MNIST (nominal: digit 1). From left to right: 1) NLL; 2) TQM<sub>1</sub>; 3) TQM<sub>2</sub>; and 4) TQM<sub>∞</sub>.

learned in the first stage, which might prevent it from being updated to a more suitable local optimum. The comparison on Fashion-MNIST dataset is similar and is shown in Appendix C.

#### 4.6 Visualization

In Figure 1, we show the violin plots of the scoring statistics NLL, TQM<sub>1</sub>, TQM<sub>2</sub>, and TQM<sub>∞</sub> on MNIST test set (with digit 1 serving the nominal class). We use the network parameters produced at every 20 epochs in training to generate each curve. We can see that, in the beginning the nominal and novel data have a large region of overlap and after more training epochs they are gradually separated. After about 20 epochs of training they can be clearly distinguished under NLL, TQM<sub>1</sub>, and TQM<sub>2</sub>, which indicates the effectiveness of these scoring functions. For TQM<sub>∞</sub>, the distribution of novel data is concentrated within a narrow region, which is near the boundary of that of nominal data. More results on visualization can be found in Appendix D.

## 5 Conclusion

The univariate quantile function was extended to the multivariate setting through increasing triangular maps, which in turn motivates us to develop a general framework for neural novelty detection. Our framework unifies and extends many existing algorithms in novelty detection. We adapted the multiple gradient algorithm to obtain an efficient, end-to-end implementation of our framework that is free of any tuning hyperparameters. We performed extensive experiments on a number of datasets to confirm the competitiveness of our method against state-of-the-art alternatives. In the future we will study the consistency of our estimation algorithm for the multivariate triangular quantile map and we plan to apply it to other multivariate probabilistic modelling tasks.

## Acknowledgement

We thank the reviewers for their constructive comments. We thank Priyank Jaini for bringing Decurninge’s work to our attention. This work is supported by NSERC.

## References

- [1] Davide Abati, Angelo Porrello, Simone Calderara, and Rita Cucchiara. Latent Space Autoregression for Novelty Detection. In *IEEE/CVF Conference on Computer Vision and Pattern Recognition*, 2019.
- [2] Elja Arjas and Tapani Lehtonen. Approximating Many Server Queues by Means of Single Server Queues. *Mathematics of Operations Research*, 3(3):205–223, 1978.
- [3] Andrew Barto, Marco Mirolli, and Gianluca Baldassarre. Novelty or Surprise? *Frontiers in Psychology*, 4:907, 2013.
- [4] Shai Ben-David and Michael Lindenbaum. Learning Distributions by Their Density Levels: A Paradigm for Learning without a Teacher. *Journal of Computer and System Sciences*, 55(1):171–182, 1997.
- [5] Vladimir Igorevich Bogachev, Aleksandr Viktorovich Kolesnikov, and Kirill Vladimirovich Medvedev. Triangular transformations of measures. *Sbornik: Mathematics*, 196(3):309–335, 2005.
- [6] Raghavendra Chalapathy, Aditya Krishna Menon, and Sanjay Chawla. Anomaly Detection using One-Class Neural Networks, 2018. arXiv:1802.06360.
- [7] Varun Chandola, Arindam Banerjee, and Vipin Kumar. Anomaly Detection: A Survey. *ACM Computing Surveys*, 41(3):15:1–15:58, 2009.
- [8] Victor Chernozhukov, Alfred Galichon, Marc Hallin, and Marc Henry. Monge–Kantorovich depth, quantiles, ranks and signs. *The Annals of Statistics*, 45(1):223–256, 2017.
- [9] Sanjoy Dasgupta, Timothy C. Sheehan, Charles F. Stevens, and Saket Navlakha. A neural data structure for novelty detection. *Proceedings of the National Academy of Sciences*, 2018.
- [10] Alexis Decurninge. *Univariate and multivariate quantiles, probabilistic and statistical approaches; radar applications*. PhD thesis, 2015.
- [11] Lucas Deecke, Robert Vandermeulen, Lukas Ruff, Stephan Mandt, and Marius Kloft. Image Anomaly Detection with Generative Adversarial Networks. In *Machine Learning and Knowledge Discovery in Databases*, pages 3–17, 2019.
- [12] Jean-Antoine Désidéri. Multiple-gradient descent algorithm (MGDA) for multiobjective optimization. *Comptes Rendus Mathématique*, 350(5):313–318, 2012.
- [13] Ivar Ekeland, Alfred Galichon, and Marc Henry. Comonotonic Measures of Multivariate Risks. *Mathematical Finance*, 22(1):109–132, 2012.
- [14] W. Fan, M. Miller, S. Stolfo, W. Lee, and P. Chan. Using artificial anomalies to detect unknown and known network intrusions. *Knowledge and Information Systems*, 6(5):507–527, 2004.
- [15] Jörg Fliege and Benar Fux Svaiter. Steepest descent methods for multicriteria optimization. *Mathematical Methods of Operations Research*, 51(3):479–494, 2000.
- [16] Alfred Galichon and Marc Henry. Dual theory of choice with multivariate risks. *Journal of Economic Theory*, 147(4):1501–1516, 2012.
- [17] Andrew B. Gardner, Abba M. Krieger, George Vachtsevanos, and Brian Litt. One-Class Novelty Detection for Seizure Analysis from Intracranial EEG. *Journal of Machine Learning Research*, 7:1025–1044, 2006.
- [18] Izhak Golan and Ran El-Yaniv. Deep Anomaly Detection Using Geometric Transformations. In *Advances in Neural Information Processing Systems 31*, pages 9758–9769. 2018.
- [19] Paul M. Hayton, Bernhard Schölkopf, Lionel Tarassenko, and Paul Anuzis. Support Vector Novelty Detection Applied to Jet Engine Vibration Spectra. In *Advances in Neural Information Processing Systems 13*, pages 946–952, 2001.

- [20] Chin-Wei Huang, David Krueger, Alexandre Lacoste, and Aaron Courville. Neural Autoregressive Flows. In *ICML*, 2018.
- [21] David Inouye and Pradeep Ravikumar. Deep Density Destructors. In *Proceedings of the 35th International Conference on Machine Learning*, pages 2167–2175, 2018.
- [22] Priyank Jaini, Kira A. Selby, and Yaoliang Yu. Sum-of-Squares Polynomial Flow. In *Proceedings of The 36th International Conference on Machine Learning*, 2019.
- [23] Diederik P Kingma and Max Welling. Auto-Encoding Variational Bayes. In *International Conference on Learning Representations*, 2014.
- [24] Yann LeCun. The mnist database of handwritten digits. <http://yann.lecun.com/exdb/mnist/>.
- [25] W. Li, V. Mahadevan, and N. Vasconcelos. Anomaly Detection and Localization in Crowded Scenes. *IEEE Transactions on Pattern Analysis and Machine Intelligence*, 36(1):18–32, 2014.
- [26] Shiyu Liang, Yixuan Li, and R. Srikant. Enhancing The Reliability of Out-of-distribution Image Detection in Neural Networks. In *International Conference on Learning Representations*, 2018.
- [27] Moshe Lichman. UCI machine learning repository. <http://kdd.ics.uci.edu/databases/kddcup99>.
- [28] Moshe Lichman. UCI machine learning repository. <http://archive.ics.uci.edu/ml>.
- [29] Larry Manevitz and Malik Yousef. One-class document classification via Neural Networks. *Neurocomputing*, 70(7):1466–1481, 2007.
- [30] Larry M. Manevitz and Malik Yousef. One-Class SVMs for Document Classification. *Journal of Machine Learning Research*, 2:139–154, 2001.
- [31] Markos Markou and Sameer Singh. Novelty detection: a review—part 1: statistical approaches. *Signal Processing*, 83(12):2481–2497, 2003.
- [32] Markos Markou and Sameer Singh. Novelty detection: a review—part 2: neural network based approaches. *Signal Processing*, 83(12):2499–2521, 2003.
- [33] Youssef Marzouk, Tarek Moselhy, Matthew Parno, and Alessio Spantini. *Sampling via Measure Transport: An Introduction*, pages 1–41. Springer, 2016.
- [34] Aditya Krishna Menon and Robert C. Williamson. A loss framework for calibrated anomaly detection. In *Advances in Neural Information Processing Systems 31*, pages 1494–1504, 2018.
- [35] Mary M. Moya and Don R. Hush. Network constraints and multi-objective optimization for one-class classification. *Neural Networks*, 9(3):463–474, 1996.
- [36] H. Mukai. Algorithms for multicriterion optimization. *IEEE Transactions on Automatic Control*, 25(2):177–186, 1980.
- [37] G. L. O’Brien. The Comparison Method for Stochastic Processes. *The Annals of Probability*, 3(1):80–88, 1975.
- [38] George Papamakarios, Theo Pavlakou, and Iain Murray. Masked autoregressive flow for density estimation. In *Advances in Neural Information Processing Systems*, pages 2338–2347, 2017.
- [39] Deepak Pathak, Pulkit Agrawal, Alexei A. Efros, and Trevor Darrell. Curiosity-driven Exploration by Self-supervised Prediction. In *Proceedings of the 34th International Conference on Machine Learning*, pages 2778–2787, 2017.
- [40] Stanislav Pidhorskyi, Ranya Almohsen, and Gianfranco Doretto. Generative Probabilistic Novelty Detection with Adversarial Autoencoders. In *Advances in Neural Information Processing Systems 31*, pages 6823–6834, 2018.

- [41] Marco A.F. Pimentel, David A. Clifton, Lei Clifton, and Lionel Tarassenko. A review of novelty detection. *Signal Processing*, 99:215–249, 2014.
- [42] M. Ravanbakhsh, M. Nabi, E. Sangineto, L. Marcenaro, C. Regazzoni, and N. Sebe. Abnormal event detection in videos using generative adversarial nets. In *IEEE International Conference on Image Processing (ICIP)*, pages 1577–1581, 2017.
- [43] M. Ravanbakhsh, E. Sangineto, M. Nabi, and N. Sebe. Training Adversarial Discriminators for Cross-Channel Abnormal Event Detection in Crowds. In *IEEE Winter Conference on Applications of Computer Vision (WACV)*, pages 1896–1904, 2019.
- [44] Lukas Ruff, Robert Vandermeulen, Nico Goernitz, Lucas Deecke, Shoaib Ahmed Siddiqui, Alexander Binder, Emmanuel Müller, and Marius Kloft. Deep One-Class Classification. In *Proceedings of the 35th International Conference on Machine Learning*, volume 80, pages 4393–4402, 2018.
- [45] Ludger Rüschendorf. Stochastically ordered distributions and monotonicity of the oc-function of sequential probability ratio tests. *Series Statistics*, 12(3):327–338, 1981.
- [46] M. Sabokrou, M. Khalooei, M. Fathy, and E. Adeli. Adversarially Learned One-Class Classifier for Novelty Detection. In *IEEE/CVF Conference on Computer Vision and Pattern Recognition*, pages 3379–3388, 2018.
- [47] Mohammad Sabokrou, Mohsen Fayyaz, Mahmood Fathy, Zahra. Moayed, and Reinhard Klette. Deep-anomaly: Fully convolutional neural network for fast anomaly detection in crowded scenes. *Computer Vision and Image Understanding*, 172:88–97, 2018.
- [48] Thomas Schlegl, Philipp Seeböck, Sebastian M. Waldstein, Georg Langs, and Ursula Schmidt-Erfurth. f-AnoGAN: Fast unsupervised anomaly detection with generative adversarial networks. *Medical Image Analysis*, 54:30–44, 2019.
- [49] Bernhard Schölkopf, John C. Platt, John Shawe-Taylor, Alex J. Smola, and Robert C. Williamson. Estimating the Support of a High-Dimensional Distribution. *Neural Computation*, 13(7):1443–1471, 2001.
- [50] Alessio Spantini, Daniele Bigoni, and Youssef Marzouk. Inference via low-dimensional couplings. *Journal of Machine Learning Research*, 19:1–71, 2018.
- [51] Ingo Steinwart, Don Hush, and Clint Scovel. A classification framework for anomaly detection. *Journal of Machine Learning Research*, 6:211–232, 2005.
- [52] Akiko Takeda and Masashi Sugiyama.  $\nu$ -Support Vector Machine as Conditional Value-at-Risk Minimization. In *25<sup>th</sup> International Conference on Machine Learning*, pages 1056–1063, 2008.
- [53] David M. J. Tax and Robert P. W. Duin. Support vector data description. *Machine learning*, 54(1):45–66, 2004.
- [54] Cédric Villani. *Optimal Transport: Old and New*, volume 338. Springer, 2008.
- [55] Pascal Vincent, Hugo Larochelle, Yoshua Bengio, and Pierre-Antoine Manzagol. Extracting and composing robust features with denoising autoencoders. In *Proceedings of the 25th international conference on Machine learning*, pages 1096–1103, 2008.
- [56] Y. Xia, X. Cao, F. Wen, G. Hua, and J. Sun. Learning Discriminative Reconstructions for Unsupervised Outlier Removal. In *IEEE International Conference on Computer Vision (ICCV)*, pages 1511–1519, 2015.
- [57] Han Xiao, Kashif Rasul, and Roland Vollgraf. Fashion-MNIST: a novel image dataset for benchmarking machine learning algorithms. arXiv:1708.07747, 2017.
- [58] Shuangfei Zhai, Yu Cheng, Weining Lu, and Zhongfei Zhang. Deep Structured Energy Based Models for Anomaly Detection. In *Proceedings of The 33rd International Conference on Machine Learning*, volume 48, pages 1100–1109, 2016.
- [59] Bo Zong, Qi Song, Martin Renqiang Min, Wei Cheng, Cristian Lumezanu, Daeki Cho, and Haifeng Chen. Deep Autoencoding Gaussian Mixture Model for Unsupervised Anomaly Detection. In *International Conference on Learning Representations*, 2018.

## A Datasets and network architectures

In this section, we briefly describe the datasets, the network architectures, as well as the hyperparameters that are used in our proposed algorithm. For all image datasets, the pixel values of each image are scaled to  $[0, 1]$ . For non-image datasets, no extra preprocessing is applied. The statistics of the datasets are summarized in Table 5.

- **MNIST** [24]
  - Dataset description: MNIST [24] includes 70,000 grayscale images of numeric digits from 0 to 9, each of size  $28 \times 28$ . There are 7,000 examples per class. The training set contains 60,000 examples, and the test set contains 10,000 examples.
  - Network architecture: We use the same autoencoder as that in LSA, and the dimension of the latent vector is set to 64. The estimation network is based on SOS [22], which contains multiple blocks each consisting of a SOS-flow layer, a normalization flow layer and a reversing layer. The number of blocks is set to 1. In the SOS-flow layer, we set  $k = 5$  and  $r = 4$  in Eqn. (8) in [22]. All the parameters are generated by a conditioner network, which contains one fully-connected layer: FC(724, 64, none)-FC(64,  $c$ , none), where  $c$  is the number of the parameters in the SOS-flow layer.
  - Optimization hyperparameters: The number of epochs is set to 1000, and training is stopped after 100 epochs of non-decreasing loss. The size of each mini-batch is 256. We use Adam with the learning rate  $10^{-5}$ .
- **Fashion-MNIST** [57]
  - Dataset description: Fashion-MNIST includes 70,000 grayscale images of fashion products in 10 classes. This dataset has the same image size and the structure of training and test splits as in MNIST.
  - Network architecture: same as that in MNIST.
  - Optimization hyperparameters: same as those in MNIST.
- **KDDCUP** [27]
  - Dataset description: KDDCUP dataset contains 125 dimensions in total. In this dataset, 20% of data are labeled as “normal” and the rest are labeled as “attack”. We treat “normal” data as novel since they are minority.
  - Network architecture: We use the same autoencoder as that in DAGMM except that the dimension of the latent vector is set to 2. The structure of the autoencoder is as follows: FC(125,60,tanh)-FC(60,30,tanh)-FC(60,30,tanh)-FC(30,10,tanh)-FC(10,2,none)-FC(2,10,tanh)-FC(10,30,tanh)-FC(30,60,tanh)-FC(60,125,tanh).
  - Optimization hyperparameters: The size of each mini-batch is 1024. The learning rate in Adam is  $10^{-5}$ . Training is stopped after 100 epochs of non-decreasing loss.
- **Thyroid** [28]
  - Dataset description: Thyroid dataset consists of three classes. We treat the hyperfunction class as the novel class and the rest as the nominal class.
  - Network architecture: We remove the autoencoder and only use the same estimation network as that in MNIST.
  - Optimization hyperparameters: The size of each mini-batch is 1024. The learning rate in Adam is  $10^{-3}$ . Training is stopped after 100 epochs of non-decreasing loss.

Table 5: Statistics of Datasets

|               | Dimension | Instance | Classes | Anomaly ratio |
|---------------|-----------|----------|---------|---------------|
| MNIST         | 784       | 70,000   | 10      | 0.9           |
| Fashion-MNIST | 784       | 70,000   | 10      | 0.9           |
| KDDCUP        | 125       | 494,021  | 2       | 0.2           |
| Thyroid       | 6         | 3,772    | 2       | 0.025         |

## B Comparison between density and quantile approaches

**Theorem 1** *In the univariate case, if the nominal distribution  $F_0$  is unimodal and symmetric w.r.t the origin, then the density approach and the quantile approach achieve the same AUROC.*

*Proof:* It is well-known that AUROC is equal to the probability of a random nominal example being ranked higher than a random novel example, i.e.,

$$\text{AUROC} = \Pr(\mathcal{S}(X_0) > \mathcal{S}(X_1)),$$

where  $X_0 \sim F_0$  is nominal and  $X_1 \sim F_1$  is novel, and  $\mathcal{S}$  is the scoring rule.

For the density approach, we have  $\mathcal{S} = f_0$ , where  $f_0 = F_0'$  is the density of the nominal distribution. Thus,

$$\text{AUROC}_{\text{NLL}} = \Pr(f_0(X_0) > f_0(X_1)) = \Pr(|X_0| < |X_1|),$$

where the last equality follows from the unimodal and symmetric assumption on  $f_0$ .

On the other hand, for the quantile approach, the scoring rule is  $\mathcal{S} = -|F_0 - \frac{1}{2}|$  (note the negation since we assume the higher  $\mathcal{S}$  is the more nominal it is). Thus,

$$\begin{aligned} \text{AUROC} &= \Pr(-|F_0(X_0) - \frac{1}{2}| > -|F_0(X_1) - \frac{1}{2}|) \\ &= \Pr(|F_0(X_0) - F_0(0)| < |F_0(X_1) - F_0(0)|) \\ &= \Pr(|X_0| < |X_1|), \end{aligned}$$

where again the last equality is due to the unimodal and symmetric assumption on  $F_0$ . ■

**Remark 2** *There is nothing special about the origin: the same result holds if  $F_0$  is unimodal and symmetric w.r.t any point  $c$ .*

**Remark 3** *We suspect a similar result holds for multivariate distributions as well. A natural condition on  $f_0$  is that its contours are multiples of the  $\ell_\infty$  ball. We need to show that the TQM for such distributions are symmetric in some sense.*

**Theorem 2** *In the univariate case, if the nominal distribution  $F_0$  is uni-modal and symmetric, then the density approach and the quantile approach lead to the same ROC curve.*

*Proof:* Denote the novel data as positive and nominal data as negative. For the quantile approach, given a threshold  $t_q$  the set of data identified as novel can be characterized by  $\{x : |F_0(x) - \frac{1}{2}| > t_q\}$ . In contrast, for the density approach, given a threshold  $t_d$  the identified novel data can be characterized by  $\{x : -f_0(x) > t_d\}$ , where  $f_0(x)$  is the density of the nominal distribution. For both cases, the left hand side of the inequality represents the scoring function, and the higher the value of the scoring function the more likely the data being identified as novel.

In an ROC curve, each point is associated with a threshold. Therefore, to prove the result it suffices to show that there exists a one-to-one correspondence between  $t_q$  and  $t_d$  that leads to the same partition of the novel and nominal regions under the quantile and density approach respectively. Obviously, if  $F_0$  is uni-modal and symmetric, given  $t_q$  we can set  $t_d = -f_0(F^{-1}(t_q + \frac{1}{2}))$  and the partition is the same. ■

**Remark 4** *In general the above conclusion cannot be extended to the multivariate case. For example, assume that the nominal data follows the 2-D standard Gaussian. Then, under the density approach, the boundary between novel and nominal data is an ellipsoid; while under the quantile approach, the boundary is square (assuming we employ the infinity norm scoring rule). The corresponding experimental results are shown below.*

### B.1 1-D: uni-model and symmetric model

Assume that the nominal data follows the standard univariate Gaussian distribution  $N(10, 1)$ . Consider two types of novel data: I) novel data are far away from nominal data, say following  $N(15, 1)$ ;

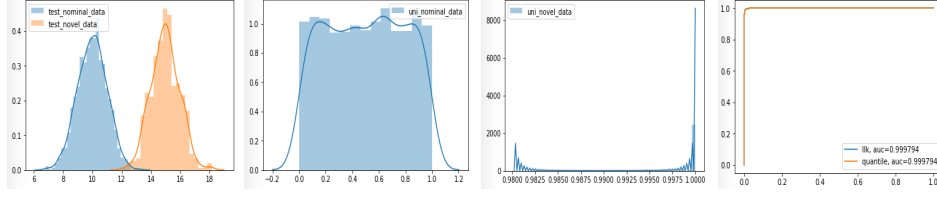

Figure 2: Type I novel data. 1) distribution of test data; 2) distribution of pre-image in  $[0, 1]$  for nominal data; 3) distribution of pre-image in  $[0, 1]$  for novel data; and 4) ROC curve.

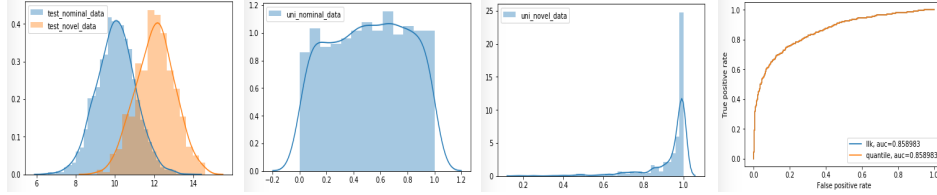

Figure 3: Type II novel data. 1) distribution of test data; 2) distribution of pre-image in  $[0, 1]$  for nominal data; 3) distribution of pre-image in  $[0, 1]$  for novel data; and 4) ROC curve.

and II) novel data are near nominal data, say following  $N(12, 1)$ . For both cases, the density and quantile methods have exactly the same ROC curve, confirming our theoretical results above. In particular, for the first case, the curve goes vertically from  $(0, 0)$  to  $(0, 1)$ , and then horizontally to  $(1, 1)$ , indicating perfect performance in anomaly detection. See Figures 2 and 3.

## B.2 1-D: mixture model

Assume that the nominal data follows the Gaussian mixture model  $0.7N(0, 2^2) + 0.3N(10, 1)$ . Consider two types of novel data: I) novel data is far away from nominal data, say following  $N(15, 1)$ ; and II) novel data is surrounded by nominal data, say following  $N(5, 1)$ . For the first case, both methods have perfect performance; while for the second case, the quantile method is dominated by the density method. See Figures 4 and 5.

## B.3 2-D: uni-modal and symmetric model

Assume that the nominal data follows the 2-D Gaussian distribution with mean  $[0, 0]$  and covariance matrix  $[1, 0; 0, 1]$ . Consider two types of novel data: I) novel data is far away from nominal data, say following the 2-D Gaussian distribution with mean  $[5, 5]$  and covariance matrix  $[1, 0; 0, 1]$ ; and II) novel data is near nominal data and follows the 2-D Gaussian distribution with mean  $[2, 2]$  and covariance matrix  $[1, 0; 0, 1]$ . For the first case, both methods have perfect performance; while for the second case, the density method is slightly better than the quantile method. See Figures 6 and 7.

## B.4 2-D: donut example

Let us consider the donut distribution<sup>2</sup>

$$p(x, y) = \begin{cases} \frac{1}{3\pi}, & \text{if } 1 \leq x^2 + y^2 \leq 4 \\ 0, & \text{otherwise} \end{cases}.$$

Under the increasing triangular map  $\mathbf{Q}$ , the pre-images of  $x$  and  $y$  in  $[0, 1]^2$  are  $F(x)$  and  $F(y|x)$ , respectively, where  $F(\cdot)$  denotes the cumulative distribution function.

The marginal density of  $x$  can be represented by

$$p(x) = \begin{cases} \frac{2}{3\pi}(\sqrt{4-x^2} - \sqrt{1-x^2}), & \text{if } -1 < x < 1 \\ \frac{2}{3\pi}\sqrt{4-x^2}, & \text{if } -2 \leq x \leq -1 \text{ or } 1 \leq x \leq 2 \\ 0 & \text{otherwise} \end{cases}.$$

<sup>2</sup>We thank an anonymous reviewer for suggesting this example.

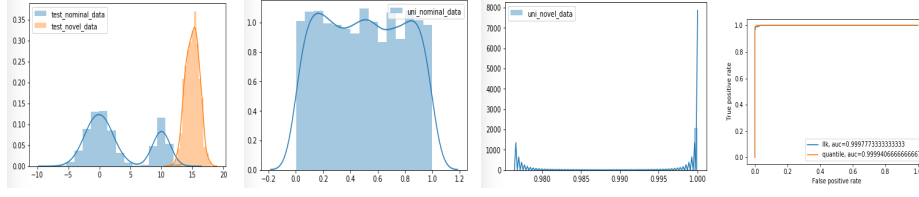

Figure 4: Type I novel data. 1) distribution of test data; 2) distribution of pre-image in  $[0, 1]$  for nominal data; 3) distribution of pre-image in  $[0, 1]$  for novel data; and 4) ROC curve.

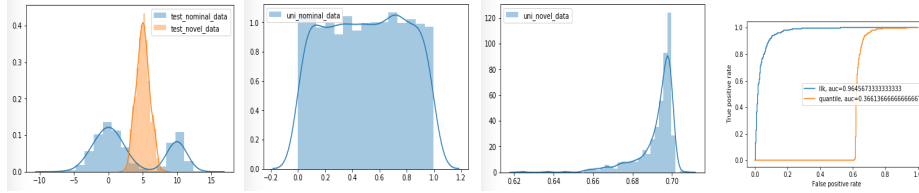

Figure 5: Type II novel data. 1) distribution of test data; 2) distribution of pre-image in  $[0, 1]$  for nominal data; 3) distribution of pre-image in  $[0, 1]$  for novel data. The novel data are projected around the middle instead of at the ends; and 4) ROC curve.

Then  $F(x)$  can be calculated as follows:

$$F(x) = \begin{cases} 0, & \text{if } x < -2 \\ \frac{2}{3\pi} \left( \frac{x}{2} \sqrt{4-x^2} + 2 \arcsin \frac{x}{2} + \pi \right), & \text{if } -2 \leq x < -1 \\ \frac{2}{3\pi} \left( \frac{3}{4}\pi + \frac{x}{2} \sqrt{4-x^2} - \frac{x}{2} \sqrt{1-x^2} + 2 \arcsin \frac{x}{2} - \frac{1}{2} \arcsin x \right), & \text{if } -1 \leq x < 1 \\ \frac{2}{3\pi} \left( \frac{\pi}{2} + \frac{x}{2} \sqrt{4-x^2} + 2 \arcsin \frac{x}{2} \right), & \text{if } 1 \leq x < 2 \\ 1, & \text{otherwise} \end{cases} .$$

Given  $x, y$  is uniformly distributed.

1. If  $-2 \leq x \leq -1$  or  $1 \leq x \leq 2$ , the conditional density  $p(y|x)$  can be represented by

$$p(y|x) = \begin{cases} \frac{1}{2\sqrt{4-x^2}}, & \text{if } -\sqrt{4-x^2} \leq y \leq \sqrt{4-x^2} \\ 0, & \text{otherwise} \end{cases},$$

and the corresponding conditional CDF

$$F(y|x) = \begin{cases} 0, & \text{if } y < -\sqrt{4-x^2} \\ \frac{y+\sqrt{4-x^2}}{2\sqrt{4-x^2}}, & \text{if } -\sqrt{4-x^2} \leq y < \sqrt{4-x^2} \\ 1, & \text{otherwise} \end{cases} .$$

2. If  $-1 < x < 1$ ,

$$p(y|x) = \begin{cases} \frac{1}{2(\sqrt{4-x^2}-\sqrt{1-x^2})}, & \text{if } -\sqrt{4-x^2} \leq y \leq -\sqrt{1-x^2} \text{ or } \sqrt{1-x^2} \leq y \leq \sqrt{4-x^2} \\ 0, & \text{otherwise} \end{cases},$$

and the corresponding conditional CDF

$$F(y|x) = \begin{cases} 0, & \text{if } y < -\sqrt{4-x^2} \\ \frac{y+\sqrt{4-x^2}}{2(\sqrt{4-x^2}-\sqrt{1-x^2})}, & \text{if } -\sqrt{4-x^2} \leq y < -\sqrt{1-x^2} \\ \frac{1}{2}, & \text{if } -\sqrt{1-x^2} \leq y < \sqrt{1-x^2} \\ \frac{1}{2} + \frac{y-\sqrt{1-x^2}}{2(\sqrt{4-x^2}-\sqrt{1-x^2})}, & \text{if } \sqrt{1-x^2} \leq y < \sqrt{4-x^2} \\ 1, & \text{otherwise} \end{cases} .$$

On Figure 8 (left) we show the random samples of the nominal and novel data, and on Figure 8 (right) we show the pre-images of these samples in the square  $[0, 1]^2$  using the derived analytical formula. It can be seen that the outer novel data is projected onto the boundary of the square hence can be



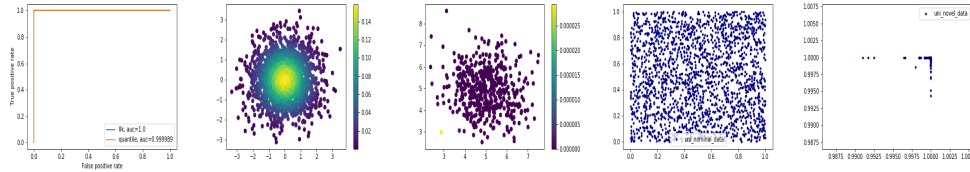

Figure 6: Type I novel data. 1) ROC curve; 2) density of nominal test data; 3) density of novel test data; 4) pre-image of nominal data in  $[0, 1]^2$ ; and 5) pre-image of novel data in  $[0, 1]^2$ .

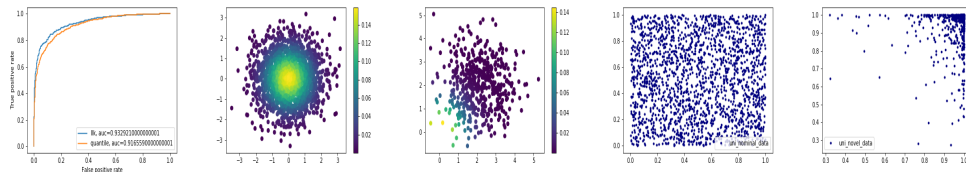

Figure 7: Type II novel data. 1) ROC curve; 2) density of nominal test data; 3) density of novel test data; 4) pre-image of nominal data in  $[0, 1]^2$ ; and 5) pre-image of novel data in  $[0, 1]^2$ .

identified using  $\text{TQM}_\infty$ . The inner novel data, however, cannot be identified easily using the current quantile-based scoring functions. To improve the performance we might need some prior knowledge of such novel data and then adjust the scoring function accordingly. In contrast, the density approach would work well by setting a density threshold between 0 and  $\frac{1}{3\pi}$ .

In Figure 9, instead of applying the analytical formula we use an SOS-based estimation network to learn the TQM. The observation is generally consistent with that derived using the analytical formula.

## B.5 Discussion

The quantile and density methods apply different scoring functions to identify novel data. Specifically, under the density method data with a low density (or log-likelihood) is deemed novel, while under the quantile method, for example, data projected to the boundary regions of the hypercube  $[0, 1]^d$  is deemed novel. A main advantage of the quantile method is that by checking whether data projected onto  $[0, 1]^d$  is uniformly distributed we can tell whether the quantile map is estimated successfully. In contrast, for the density method, generally it is difficult to assess the accuracy of the estimated density. To give an example, consider the donut example in Section B.4 and assume the outer data as novel. In Figure 10, we show the results when the TQM  $Q$  is learned by SOS and MAF [38], respectively. By projecting data onto  $[0, 1]^2$  (using the inverse TQM), we can conclude that SOS learns a better quantile map and indeed the corresponding ROC curve dominates that under MAF.

We also point out that under the current quantile thresholding rules (see §4.3) the identified nominal region is generally (path) connected, due to the increasing requirement we impose on TQM. Therefore, provided that nominal data follows some multi-modal distribution and novel data is located between different modes, as the shown example of 1-D mixture model in §B.2, the current quantile scoring rules would not work well. This reveals the importance of learning a (unimodal) hidden representation in our framework (2). It would be interesting to design new quantile thresholding rules to induce disconnected nominal region.

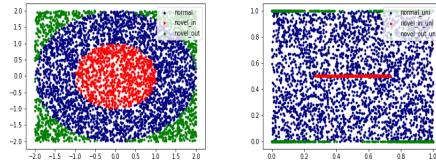

Figure 8: Donut example: 1) samples of nominal and two types of novel data; and 2) analytical pre-images in  $[0, 1]^2$  for nominal and novel data.

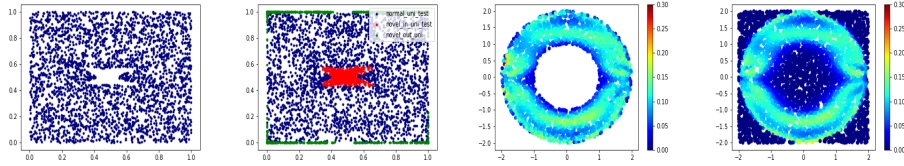

Figure 9: Donut example: The density and the quantile map are learned by SOS. (1) pre-image of nominal training data in  $[0, 1]^2$ ; 2) pre-image of test data in  $[0, 1]^2$ ; 3) density of nominal training data; and 4) density of test data.

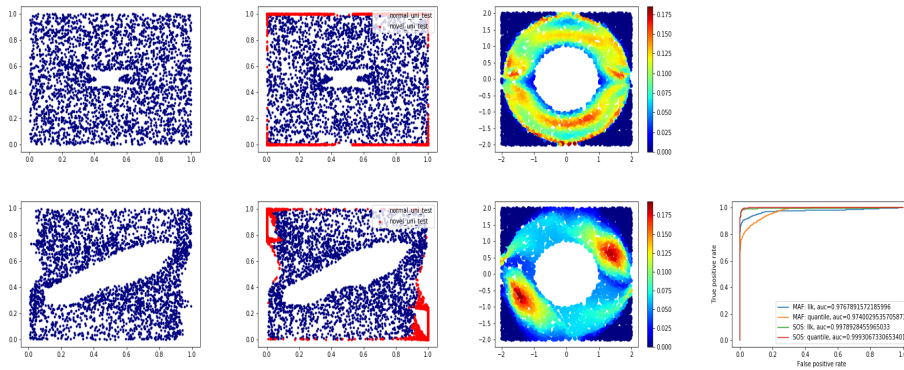

Figure 10: Donut example: In the first row, the density and the quantile map are learned by SOS: (1) pre-image of nominal training data in  $[0, 1]^2$ ; 2) pre-image of test data in  $[0, 1]^2$ ; and 3) density of test data. In the second row, the density and the quantile map are learned by MAF. The last plot shows the comparison of ROC curves.

### C More results on comparison between joint and two-stage training

In Table 6, we show the comparison between joint and two-stage training on Fashion-MNIST dataset. The observation is similar to that on MNIST dataset.

Table 6: Comparison between joint and two-stage training: AUROC on Fashion-MNIST

| Class | Fix-NLL       | Pretrain-NLL  | Ours-NLL      | Fix-TQM <sub>2</sub> | Pretrain-TQM <sub>2</sub> | Ours-TQM <sub>2</sub> |
|-------|---------------|---------------|---------------|----------------------|---------------------------|-----------------------|
| 0     | 0.9114        | 0.8612        | <b>0.9217</b> | 0.8959               | 0.8650                    | <b>0.9169</b>         |
| 1     | 0.9764        | <b>0.9852</b> | 0.9579        | 0.9639               | <b>0.9813</b>             | 0.9496                |
| 2     | 0.8799        | 0.8575        | <b>0.8985</b> | 0.8809               | 0.8548                    | <b>0.8990</b>         |
| 3     | <b>0.9370</b> | 0.9222        | 0.9304        | 0.9269               | 0.9233                    | <b>0.9245</b>         |
| 4     | 0.9013        | 0.9132        | <b>0.9223</b> | 0.8859               | 0.9080                    | <b>0.9209</b>         |
| 5     | 0.9096        | <b>0.9117</b> | 0.8940        | <b>0.9140</b>        | 0.9098                    | 0.8844                |
| 6     | 0.8424        | 0.7488        | <b>0.8435</b> | <b>0.8391</b>        | 0.7617                    | 0.8384                |
| 7     | 0.9757        | <b>0.9842</b> | 0.9802        | 0.9689               | <b>0.9843</b>             | 0.9718                |
| 8     | 0.9125        | 0.8851        | <b>0.9450</b> | 0.8962               | 0.8750                    | <b>0.9429</b>         |
| 9     | 0.9776        | <b>0.9879</b> | 0.9825        | 0.9780               | 0.9827                    | <b>0.9830</b>         |
| avg   | 0.9224        | 0.9057        | <b>0.9276</b> | 0.9150               | 0.9046                    | <b>0.9234</b>         |

### D More results on visualization

In this section, we show more visualization results on the MNIST dataset. We use digit 1 as the nominal class. The results for other classes are similar. These visualizations can be used for diagnosing the training process and for assessing the quality of the learned TQM: by definition, the pre-image of data under TQM should be uniformly distributed on the hypercube  $[0, 1]^m$ .

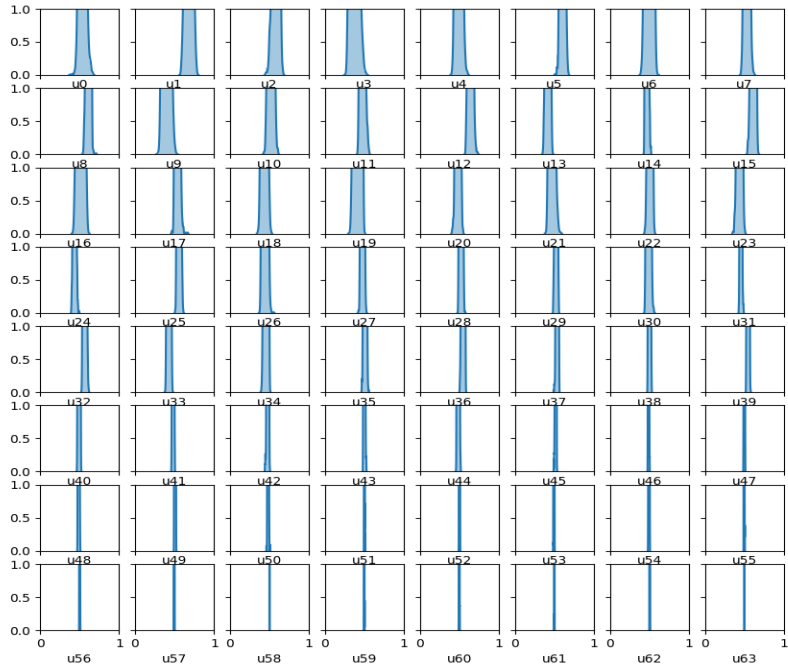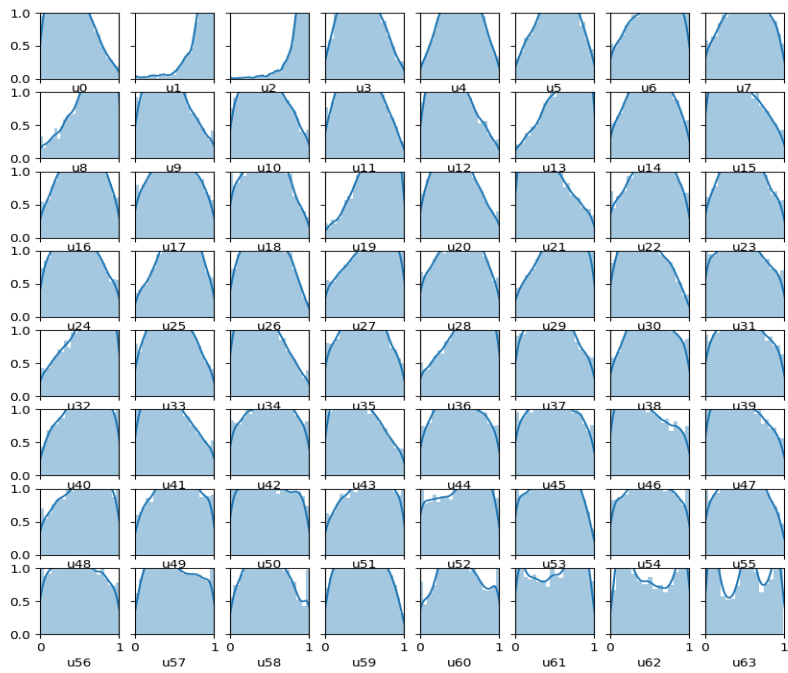

Figure 11: All marginals of pre-image of training data in  $[0, 1]^{64}$ : 1) marginals at initialization; and 2) marginals at 1000 epochs of training.

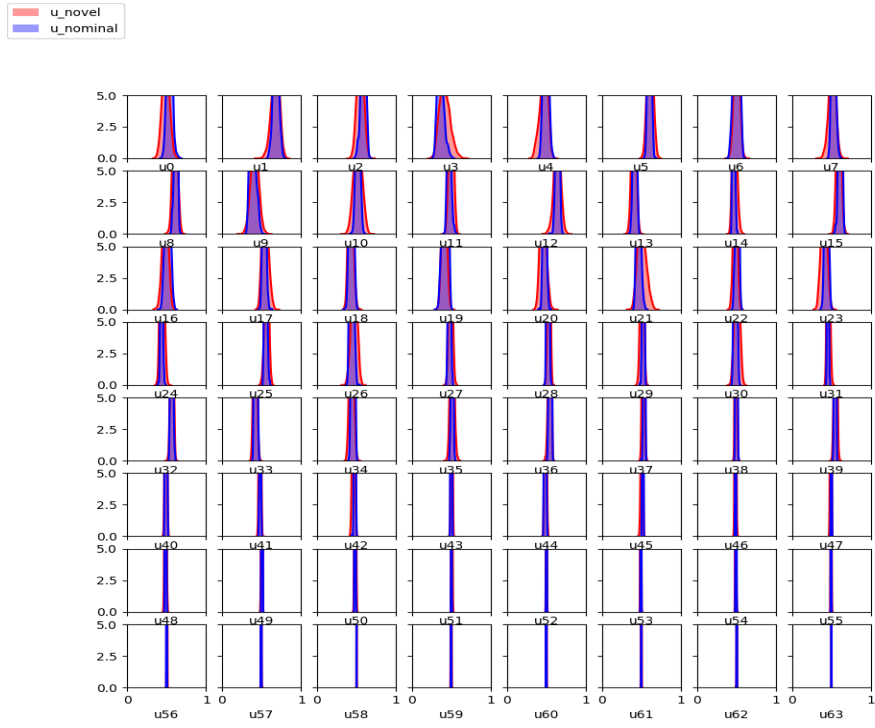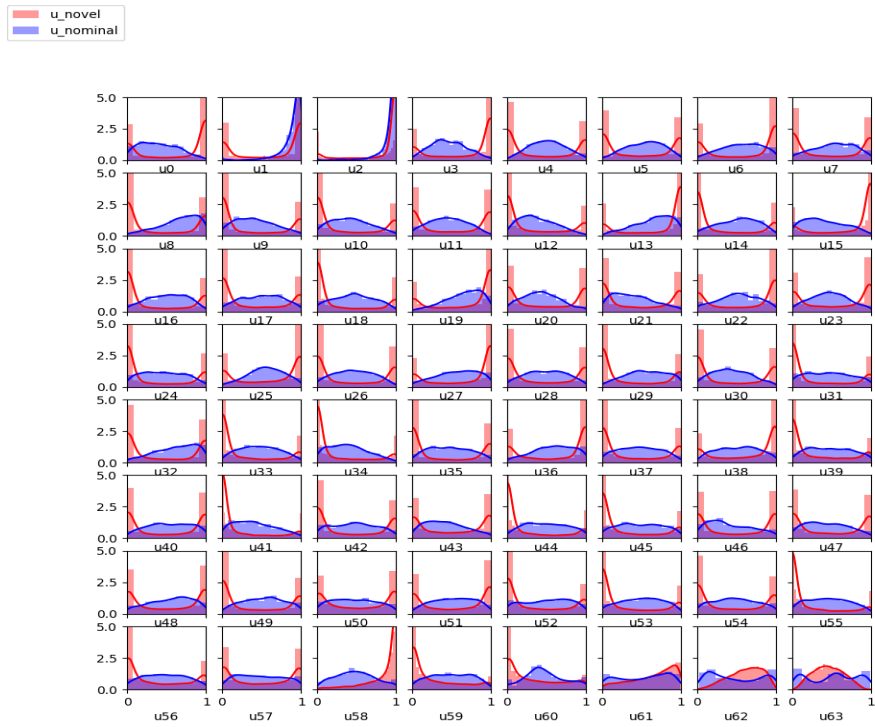

Figure 12: All marginals of pre-image of test data in  $[0, 1]^{64}$ : 1) marginals at initialization; and 2) marginals at 1000 epochs of training.

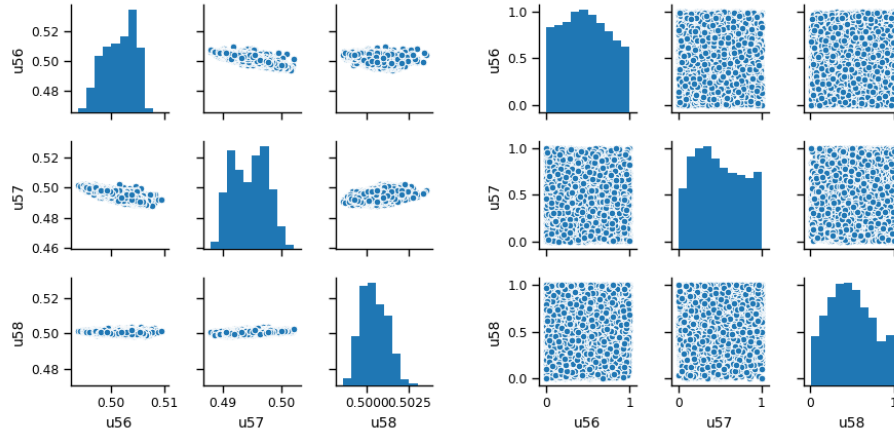

Figure 13: Marginal and joint distributions of pre-image in  $[0, 1]$  of training data (dimension: 56, 57, and 58). 1) distributions at initialization; and 2) distributions at 1000 epochs of training.

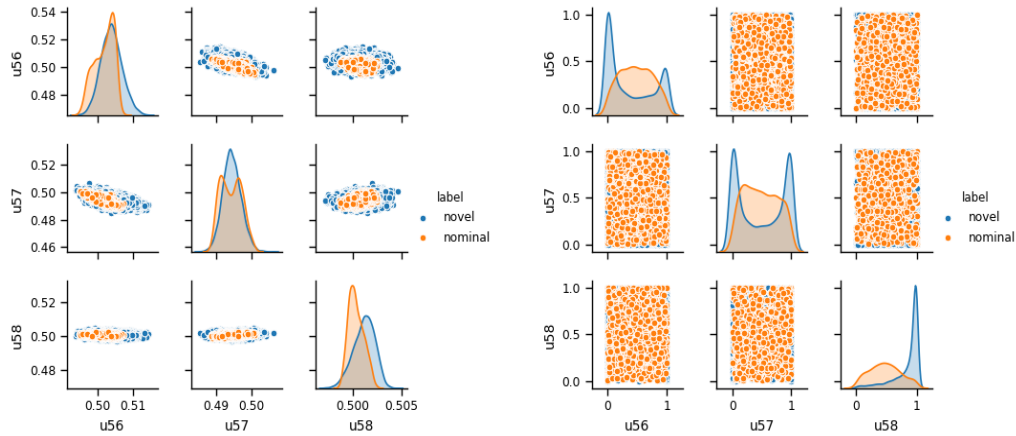

Figure 14: Marginal and joint distributions of pre-image in  $[0, 1]$  of test data (dimension: 56, 57, and 58). 1) distributions at initialization; and 2) distributions at 1000 epochs of training.
